# Supplementary material for: Downregulation of Pro-Inflammatory and Pro-Angiogenic Pathways in Prostate Cancer Cells by a Polyphenol-Rich Extract from Olive Mill Wastewater
Source: PubMed Central journal article supplement (PMC6359159; doi:10.3390/ijms20020307), 2019-01-14

Suppl. Table 1

| PHENOLIC COMPOUND                 | A009<br>BATCH 3 | A009<br>BATCH 4 |
|-----------------------------------|-----------------|-----------------|
|                                   | (g/L)           | (g/L)           |
| Hydroxytyrosol glucoside          | 1.69            | 1.91            |
| Hydroxytyrosol                    | 5.72            | 5.50            |
| Tyrosol                           | ND              | 0.69            |
| Chlorogenic acid                  | 0.10            | 0.13            |
| b-hydroxyverbascoside isomer 1    | 0.14            | 0.23            |
| b-hydroxyverbascoside isomer 2    | 0.17            | 0.23            |
| Verbascoside                      | 1.32            | 1.07            |
| Caffeoyl ester of secologanoside  | 0.20            | 0.23            |
| Decarboxymethyloleuropein aglycon | 0.28            | 0.16            |
| Oleuropein aglycon                | 0.22            | 0.21            |
| 6'-p-coumaroyl secologanoside     | 0.40            | 0.35            |
| Rutin                             | ND              | ND              |
| Luteolin-7-o-glucoside            | ND              | ND              |

Suppl. Figure 1

PC-3

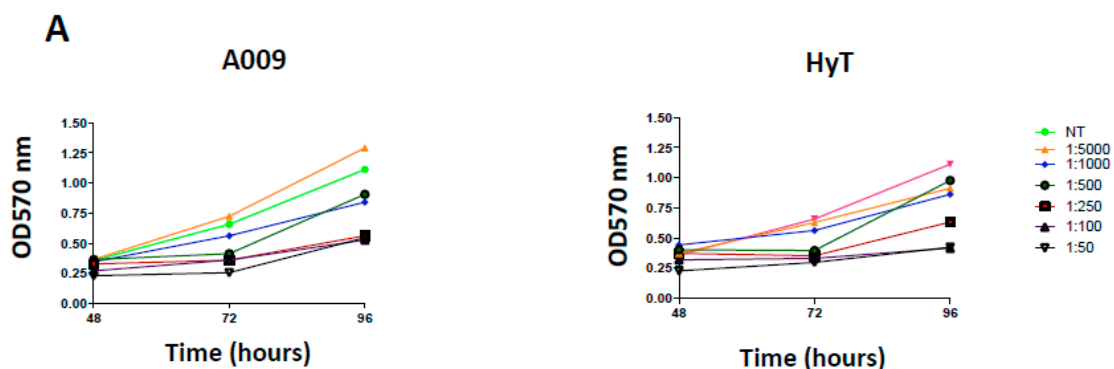

# DU-145

**B**

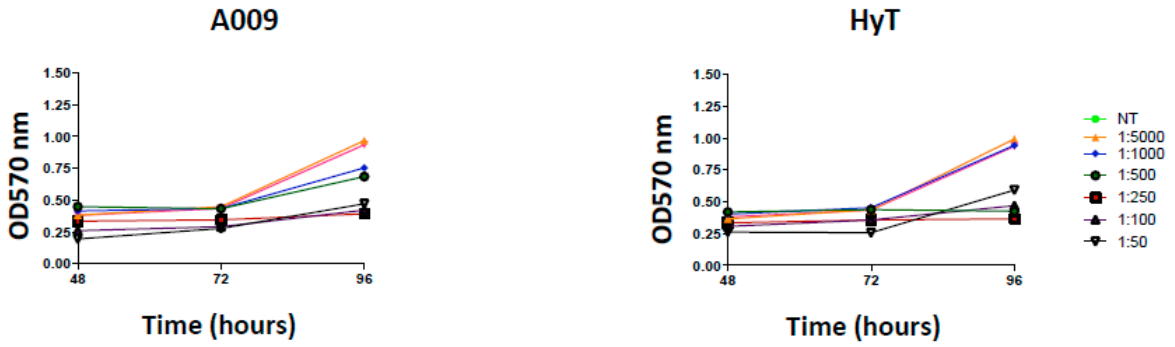

# LNCaP

# LNCaP

**C**

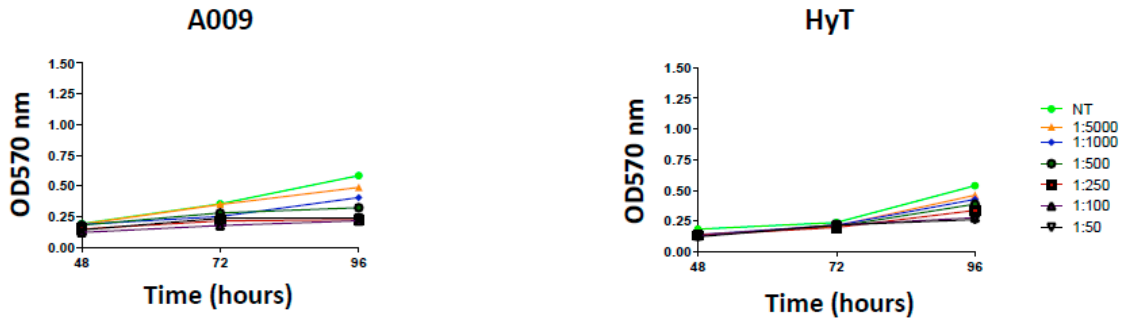

## Suppl. Figure 2

**A**

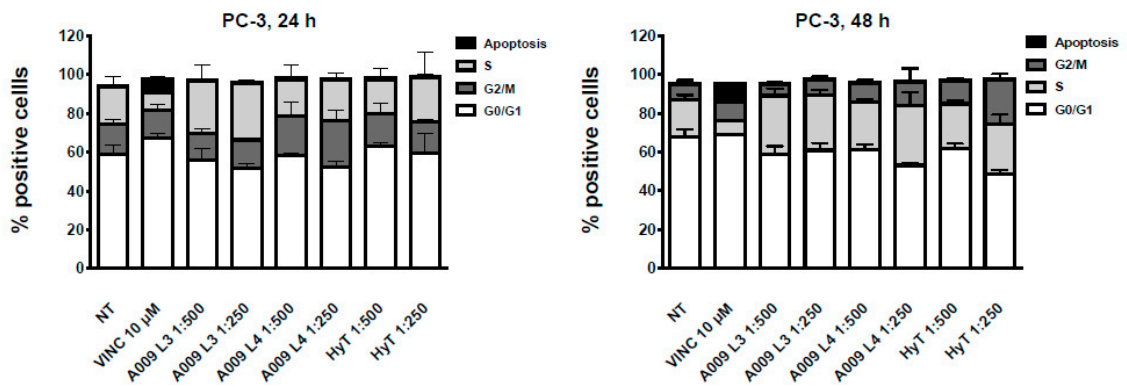

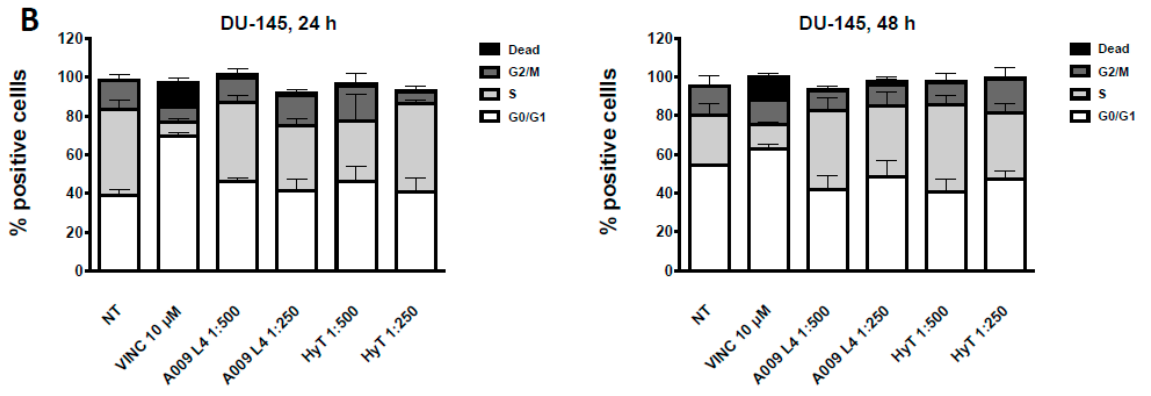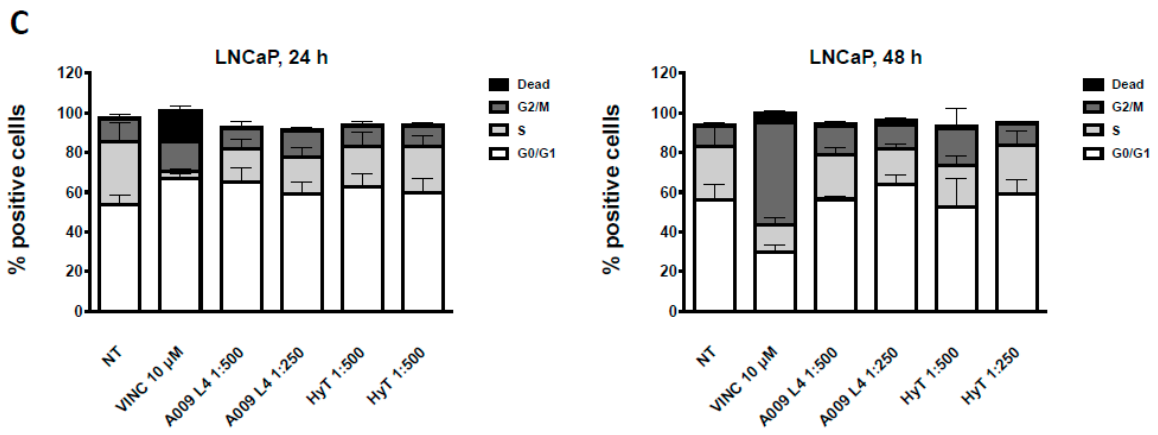

Supplement: ijms-20-00307-s001.pdf [file ijms-20-00307-s001.pdf]
